# Supplementary material for: Immunostimulatory Effect of Zanthoxylum schinifolium‐Based Complex Oil Prepared by Supercritical Fluid Extraction in Splenocytes and Cyclophosphamide‐Induced Immunosuppressed Rats
Source: Hindawi journal article supplement (doi:10.1155/2018/8107326), 2018-01-01

# Supplementary Figure 1

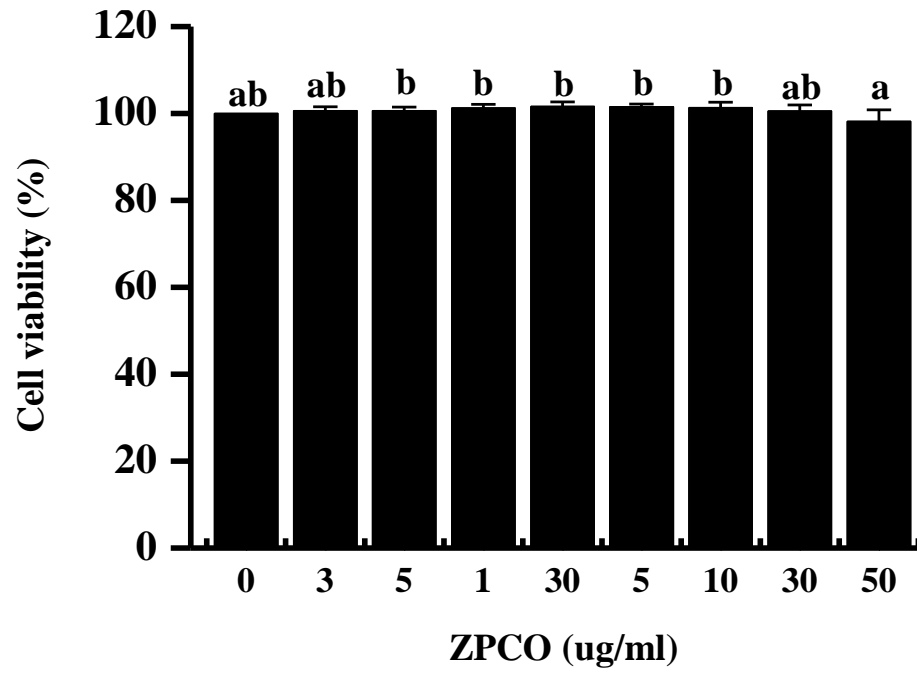

# Supplementary Figure 2

## A

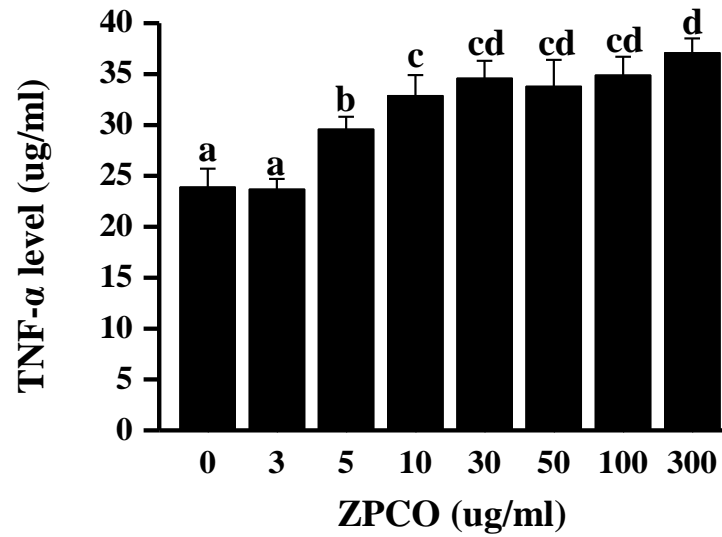

## B

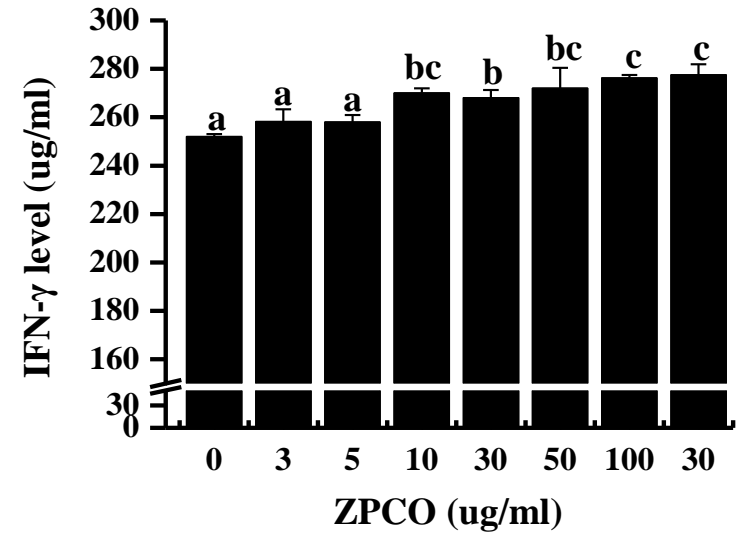

## C

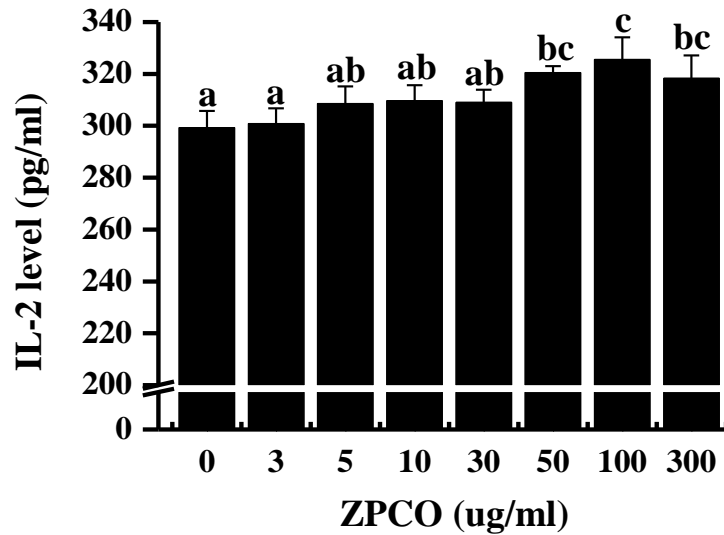

## D

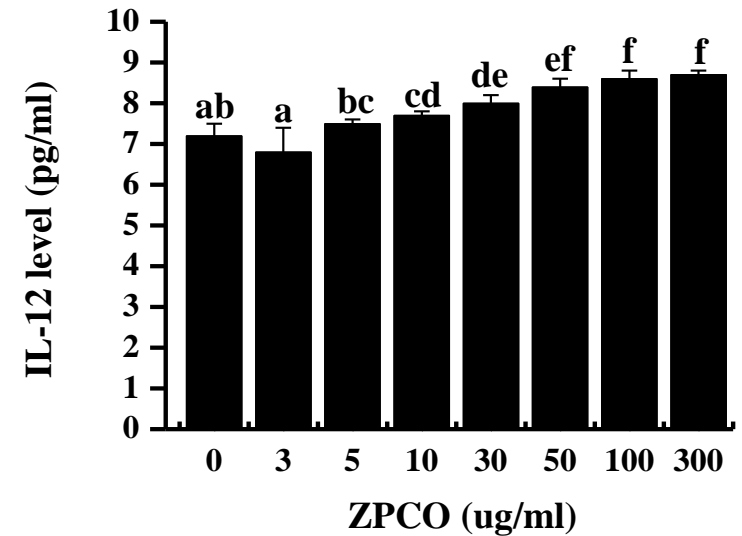

# Supplementary Figure 3

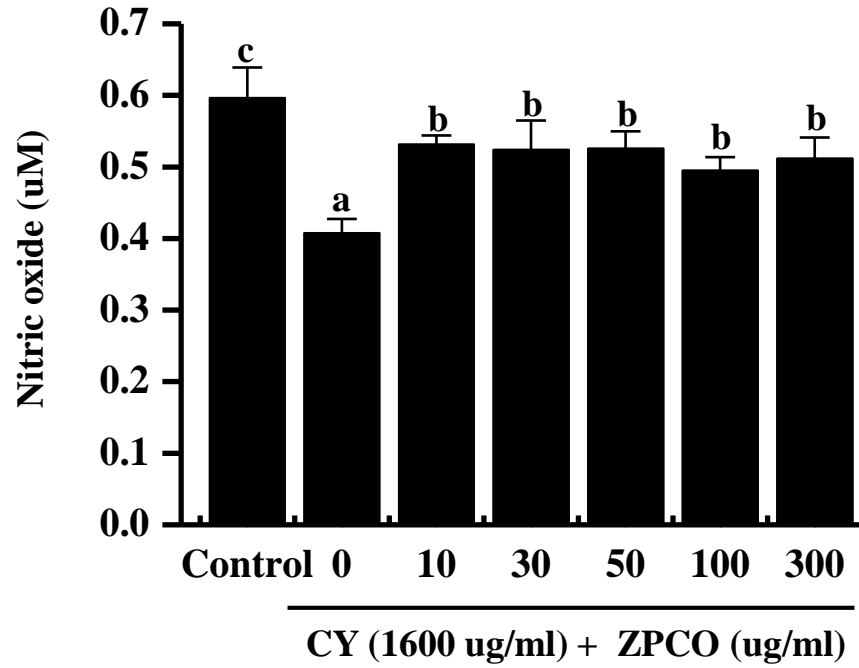

Supplement: f1 [file 8107326.f1.pdf]
